# Supplementary material for: Evaluating and improving simulations of diurnal variation in land surface temperature with the Community Land Model for the Tibetan Plateau
Source: PeerJ. 2021 Mar 16;9:e11040. doi: 10.7717/peerj.11040 (PMC7977383; doi:10.7717/peerj.11040)
Supplement: Supplemental Information 2 [file peerj-09-11040-s002.xlsx]

## Sheet: Sheet1
	CLM_ORI	CLM_NEW	OBS_10cm
1	1.97225	1.17187	0.973469
2	1.97731	1.17776	0.675083
3	1.98097	1.18074	0.77126
4	1.99059	1.18534	1.02655
5	2.01752	1.20401	0.699769
6	2.03884	1.21106	1.21665
7	2.13651	1.24608	1.53328
8	2.23127	1.32478	0.720197
9	2.23027	1.33397	0.856898
10	2.22452	1.33873	0.851825
11	2.21641	1.34049	0.864398
12	2.20726	1.34025	0.830221
13	2.19781	1.33868	0.852523
14	2.18846	1.33624	0.821401
15	2.17939	1.33326	0.855598
16	2.17072	1.32993	0.857373
17	2.16247	1.32641	0.836235
18	2.15464	1.3228	0.836075
19	2.14722	1.31916	0.923722
20	2.14012	1.31551	1.16715
21	2.1697	1.32167	0.749532
22	2.22395	1.34417	0.812958
23	2.24879	1.36154	0.826485
24	2.25521	1.37092	0.926421
25	2.25208	1.37452	1.01015
26	2.24432	1.37439	1.03114
27	2.23456	1.37201	0.898108
28	2.22424	1.36838	0.781045
29	2.21385	1.36398	1.14449
30	2.18553	1.34973	0.813066
31	2.17735	1.34516	0.842964
32	2.16965	1.34072	0.876325
33	2.16238	1.33644	0.894514
34	2.1555	1.33231	0.818445
35	2.14895	1.32833	0.827921
36	2.14272	1.32449	0.85315
37	2.13676	1.32081	0.836263
38	2.13105	1.31725	0.8974
39	2.12558	1.31383	0.869413
40	2.1203	1.31051	0.96787
41	2.11213	1.30459	0.617037
42	2.12502	1.30682	0.785153
43	2.1435	1.31343	0.782364
44	2.15475	1.31912	0.837142
45	2.15955	1.32269	0.844241
46	2.15988	1.32425	1.13619
47	2.15728	1.3242	0.955791
48	2.15308	1.32306	0.786501
49	2.1482	1.32121	0.999138
50	2.14918	1.32083	1.15621
51	2.15423	1.32242	0.70799
52	2.15344	1.32246	0.854637
53	2.15105	1.32183	0.891939
54	2.14756	1.32059	0.829504
55	2.14337	1.31889	0.833291
56	2.1388	1.31686	0.855689
57	2.13402	1.31461	0.853724
58	2.12918	1.3122	0.847157
59	2.12434	1.3097	0.833616
60	2.11957	1.30715	0.826519
61	2.11488	1.30458	0.851875
62	2.11028	1.30201	1.01872
63	2.10506	1.29812	0.880234
64	2.12289	1.3029	0.598001
65	2.14193	1.31068	0.860415
66	2.15314	1.31692	0.848081
67	2.15794	1.32088	0.840393
68	2.15832	1.32278	0.915031
69	2.15584	1.32306	0.942432
70	2.15146	1.32202	0.912947
71	2.14589	1.31998	0.948266
72	2.1397	1.31729	0.996662
73	2.13327	1.3142	1.15148
74	2.12121	1.30792	0.788648
75	2.11574	1.30488	0.860261
76	2.11051	1.30189	0.869544
77	2.10552	1.29896	0.873023
78	2.10075	1.29612	0.859461
79	2.09619	1.29337	0.86893
80	2.09182	1.29072	0.834133
81	2.08762	1.28815	0.831746
82	2.08358	1.28566	0.835976
83	2.07969	1.28325	0.872567
84	2.07592	1.28091	1.16567
85	2.13475	1.29521	0.726265
86	2.21635	1.33251	0.830326
87	2.25101	1.35754	1.06888
88	2.26154	1.37116	1.01843
89	2.26045	1.37746	0.815986
90	2.2757	1.38698	0.748306
91	2.33144	1.41542	0.890364
92	2.35169	1.43452	0.904783
93	2.34617	1.43988	0.971908
94	2.33231	1.43815	1.2381
95	2.30099	1.42676	0.726457
96	2.28657	1.41997	0.848138
97	2.27331	1.41317	0.926174
98	2.26111	1.40654	0.857966
99	2.24987	1.40017	0.889204
100	2.23945	1.39411	0.847389
101	2.22976	1.38834	0.885287
102	2.22109	1.38298	0.874106
103	2.21523	1.37872	0.83875
104	2.21222	1.37581	0.844562
105	2.21166	1.3742	0.861329
106	2.21428	1.37418	0.872969
107	2.2241	1.37738	1.08616
108	2.27291	1.39673	0.7507
109	2.37167	1.44226	0.925592
110	2.39393	1.46609	0.960441
111	2.38462	1.47074	0.933623
112	2.36706	1.46716	0.967999
113	2.348	1.46006	1.1253
114	2.32982	1.45173	0.895318
115	2.27472	1.4206	0.752302
116	2.27075	1.41689	0.8649
117	2.26537	1.4133	0.8905
118	2.25832	1.4092	0.875685
119	2.25037	1.40468	0.860277
120	2.24209	1.39993	0.844865
121	2.23382	1.3951	0.866
122	2.22573	1.39029	0.867901
123	2.21791	1.38557	0.877312
124	2.2104	1.38097	0.902551
125	2.20319	1.37651	0.893857
126	2.19628	1.37219	1.02983
127	2.1962	1.36876	0.586493
128	2.21581	1.37532	0.729224
129	2.2277	1.38116	0.910272
130	2.23106	1.3839	0.886603
131	2.22906	1.38402	0.922803
132	2.22397	1.38226	0.911412
133	2.21724	1.37928	0.922195
134	2.2097	1.37554	0.946699
135	2.20181	1.37135	0.964814
136	2.19391	1.36693	1.06135
137	2.18619	1.36246	1.50777
138	2.17217	1.35402	0.800893
139	2.16591	1.35014	0.883415
140	2.15998	1.34641	0.875425
141	2.15434	1.34283	0.859599
142	2.14897	1.3394	0.866314
143	2.14385	1.33612	0.85885
144	2.13894	1.33297	0.861692
145	2.13424	1.32995	0.845955
146	2.12972	1.32704	0.851111
147	2.12536	1.32423	0.881634
148	2.12115	1.32151	1.21954
149	2.14762	1.32705	0.719821
150	2.20343	1.35004	0.805813
151	2.2301	1.36699	0.851547
152	2.23933	1.37629	0.878183
153	2.23911	1.38017	0.894967
154	2.23389	1.38052	0.909829
155	2.22615	1.37861	0.982251
156	2.2172	1.37526	0.937013
157	2.20769	1.37095	0.970972
158	2.19819	1.36619	1.02124
159	2.18895	1.36117	1.09764
160	2.17257	1.35171	0.824006
161	2.16551	1.34746	0.889101
162	2.15893	1.34342	0.901243
163	2.15277	1.3396	0.896998
164	2.14697	1.33597	0.886893
165	2.14149	1.33252	0.867396
166	2.13629	1.32924	0.866044
167	2.13134	1.3261	0.861106
168	2.1266	1.32311	0.861293
169	2.12207	1.32023	0.895957
170	2.1177	1.31747	1.17955
171	2.13924	1.32058	0.753599
172	2.17924	1.33674	0.827893
173	2.20108	1.34944	0.848838
174	2.20986	1.35698	0.91564
175	2.21091	1.36054	0.883017
176	2.20745	1.36121	0.953921
177	2.20144	1.35997	1.12717
178	2.19405	1.35731	0.932871
179	2.18631	1.35395	0.812929
180	2.17895	1.35037	0.970497
181	2.18007	1.34927	1.21051
182	2.18592	1.35086	0.869241
183	2.18476	1.35069	0.862977
184	2.18167	1.34966	0.936042
185	2.17741	1.34797	0.904547
186	2.17249	1.34581	0.837939
187	2.16722	1.34333	0.81731
188	2.16181	1.34064	0.818391
189	2.15638	1.33784	0.873341
190	2.15102	1.33498	0.894262
191	2.14577	1.33209	0.898313
192	2.1419	1.32959	1.00986
193	2.14533	1.32933	1.36831
194	2.23209	1.36295	0.766795
195	2.25964	1.38147	0.801451
196	2.26761	1.391	1.35604
197	2.25873	1.39442	0.632293
198	2.25291	1.39313	1.17411
199	2.29008	1.40685	1.57231
200	2.29631	1.42389	0.73851
201	2.28451	1.41932	0.909438
202	2.27286	1.41408	0.894967
203	2.26167	1.40857	0.845849
204	2.25108	1.40303	0.887697
205	2.24113	1.39759	0.8623
206	2.23177	1.39231	0.870637
207	2.22297	1.38722	0.875877
208	2.21467	1.38233	0.897927
209	2.20683	1.37763	0.917973
210	2.20004	1.37332	0.924235
211	2.20366	1.37275	0.975071
212	2.23992	1.3872	0.669864
213	2.26139	1.39817	0.762691
214	2.27168	1.40585	0.882263
215	2.27161	1.40855	0.928425
216	2.26566	1.40761	0.943503
217	2.25685	1.4044	0.953531
218	2.24684	1.39987	0.971308
219	2.23638	1.39454	1.00584
220	2.22591	1.38879	1.06098
221	2.21552	1.38279	1.12043
222	2.20549	1.3768	1.37457
223	2.18786	1.3659	0.798005
224	2.18034	1.36112	0.857769
225	2.17335	1.35663	0.903784
226	2.16681	1.35242	0.899952
227	2.16068	1.34845	0.903623
228	2.15488	1.3447	0.892878
229	2.14939	1.34115	0.873507
230	2.14416	1.33776	0.865078
231	2.13917	1.33452	0.860815
232	2.13439	1.33143	0.925517
233	2.12979	1.32845	1.22105
234	2.14557	1.33048	0.722232
235	2.1848	1.34651	0.842436
236	2.20604	1.35927	0.890227
237	2.2143	1.36661	0.891617
238	2.21499	1.36982	0.926658
239	2.21128	1.37015	0.963342
240	2.20512	1.36852	1.01651
241	2.19748	1.36547	0.970981
242	2.18907	1.36142	1.00936
243	2.18048	1.35691	1.06581
244	2.17202	1.35221	1.08699
245	2.15701	1.34344	0.646263
246	2.15053	1.33949	0.887975
247	2.14445	1.33572	0.953104
248	2.13873	1.33214	0.955246
249	2.13424	1.32912	0.949449
250	2.13386	1.32748	0.912721
251	2.1394	1.32829	0.93542
252	2.14761	1.33099	0.90353
253	2.1552	1.33424	0.908711
254	2.16102	1.33732	0.868351
255	2.16377	1.33941	0.929961
256	2.16377	1.3403	1.15999
257	2.19673	1.35287	0.78805
258	2.24045	1.37379	0.823472
259	2.25942	1.3882	1.11743
260	2.26297	1.39499	0.816166
261	2.25871	1.39667	1.05555
262	2.25719	1.39753	0.994649
263	2.26265	1.40101	0.844679
264	2.26149	1.40212	0.978652
265	2.25553	1.40065	1.07497
266	2.23828	1.39355	0.686009
267	2.22927	1.38916	0.916035
268	2.22058	1.38464	0.912052
269	2.2122	1.38008	0.914379
270	2.2042	1.37557	0.865392
271	2.19659	1.37116	0.878228
272	2.18935	1.36688	0.898885
273	2.18247	1.36275	0.894957
274	2.17592	1.35877	0.88425
275	2.16968	1.35494	0.880211
276	2.16371	1.35124	0.920938
277	2.15798	1.34767	1.29437
278	2.16674	1.34695	0.714413
279	2.20517	1.36249	0.886823
280	2.22513	1.37458	0.929062
281	2.23166	1.38085	0.95338
282	2.23052	1.38281	0.928984
283	2.22521	1.3819	0.948437
284	2.21778	1.37922	0.989935
285	2.20918	1.37534	1.07387
286	2.20019	1.3708	0.953085
287	2.19121	1.36594	1.10444
288	2.18258	1.36106	1.34745
289	2.16726	1.352	0.913188
290	2.16061	1.34792	0.928579
291	2.15437	1.34403	0.877711
292	2.14848	1.34032	0.919519
293	2.14291	1.33679	0.930153
294	2.13762	1.33342	0.896101
295	2.13259	1.33019	0.89583
296	2.12777	1.3271	0.866579
297	2.12315	1.32412	0.871443
298	2.11871	1.32126	0.896027
299	2.11442	1.31849	1.13378
300	2.12111	1.31721	0.734897
301	2.17944	1.33906	0.820724
302	2.21548	1.36006	0.920831
303	2.23029	1.37216	0.883796
304	2.23327	1.37783	0.924931
305	2.22982	1.37932	0.951633
306	2.22296	1.37807	0.955321
307	2.21448	1.37515	0.999117
308	2.20526	1.37118	0.937561
309	2.19589	1.36659	1.13513
310	2.18674	1.36177	1.33471
311	2.17052	1.35262	0.903024
312	2.16349	1.34846	0.961602
313	2.1569	1.34449	0.958361
314	2.15072	1.34071	0.909439
315	2.14489	1.33711	0.913336
316	2.13937	1.33368	0.906432
317	2.13413	1.3304	0.878299
318	2.12913	1.32726	0.889756
319	2.12434	1.32424	0.867281
320	2.11975	1.32134	0.883811
321	2.11533	1.31854	1.07724
322	2.1177	1.31609	0.763378
323	2.15446	1.32917	0.845428
324	2.17895	1.34214	0.86408
325	2.19046	1.35048	0.908195
326	2.1937	1.35479	0.912765
327	2.19196	1.3561	0.942853
328	2.18731	1.35531	0.944116
329	2.1809	1.35303	0.990086
330	2.17353	1.34976	1.02413
331	2.16563	1.34582	1.04441
332	2.15769	1.34158	1.19098
333	2.14337	1.33346	0.922908
334	2.13721	1.3298	0.932349
335	2.13142	1.32629	0.927893
336	2.12596	1.32293	0.90249
337	2.12081	1.31973	0.8953
338	2.11593	1.31667	0.887298
339	2.11129	1.31376	0.865781
340	2.10686	1.31097	0.872052
341	2.10262	1.30829	0.853948
342	2.09855	1.30572	0.90342
343	2.09462	1.30323	0.990221
344	2.12373	1.30985	0.688372
345	2.16815	1.32975	0.851506
346	2.19234	1.34485	0.868164
347	2.20243	1.35385	0.934885
348	2.20413	1.35826	0.904265
349	2.20094	1.35933	0.869794
350	2.19514	1.35834	0.934189
351	2.18787	1.3559	0.906403
352	2.17993	1.35259	1.0599
353	2.17177	1.34875	0.971984
354	2.16381	1.34469	1.08598
355	2.14928	1.33675	0.96817
356	2.14299	1.33313	0.991313
357	2.13705	1.32962	0.926773
358	2.1314	1.32623	0.899409
359	2.12604	1.32296	0.854194
360	2.12093	1.31981	0.863457
361	2.11604	1.31676	0.882121
362	2.11137	1.31383	0.920697
363	2.11048	1.31235	0.895601
364	2.13128	1.31838	0.882549
365	2.16307	1.33145	0.918598
366	2.19456	1.34727	0.981287
367	2.23329	1.36772	2.68095
368	2.30173	1.40093	0.541603
369	2.43443	1.47566	0.792435
370	2.45145	1.50633	1.1105
371	2.4289	1.50625	0.934355
372	2.40206	1.49765	0.764309
373	2.3774	1.48671	0.935136
374	2.36017	1.47752	1.01177
375	2.34364	1.46843	1.4063
376	2.29697	1.44138	0.814849
377	2.28373	1.43333	0.921673
378	2.27168	1.42588	0.978326
379	2.26053	1.41891	0.899416
380	2.25015	1.41238	0.954836
381	2.24046	1.40623	0.900283
382	2.23136	1.40042	0.906646
383	2.22278	1.39492	0.865892
384	2.21468	1.3897	0.832377
385	2.207	1.38473	0.922773
386	2.19971	1.38	0.905433
387	2.19273	1.37547	0.991211
388	2.1859	1.37104	1.59571
389	2.17957	1.36681	0.551337
390	2.17947	1.36488	0.905965
391	2.18306	1.36507	1.07097
392	2.18445	1.36506	0.819347
393	2.18313	1.36412	1.20888
394	2.17966	1.36217	0.893557
395	2.17508	1.35963	0.762221
396	2.16998	1.3566	0.957865
397	2.16904	1.35488	1.25068
398	2.16961	1.35418	1.90543
399	2.16654	1.35193	0.777751
400	2.16332	1.35015	0.86996
401	2.15951	1.34804	0.933406
402	2.15525	1.34564	0.867181
403	2.15075	1.34306	0.868219
404	2.14614	1.34035	0.863374
405	2.14152	1.3376	0.921494
406	2.13693	1.33482	0.903217
407	2.13242	1.33204	0.900748
408	2.12799	1.3293	0.866058
409	2.12366	1.32658	0.849733
410	2.11941	1.3239	1.21661
411	2.12416	1.32284	0.794983
412	2.15098	1.33262	0.853416
413	2.1711	1.34282	0.738544
414	2.18114	1.34957	0.891672
415	2.18407	1.35301	0.891752
416	2.18258	1.3539	0.938141
417	2.17841	1.35299	1.08041
418	2.17254	1.35071	0.990639
419	2.16597	1.3477	0.866396
420	2.15247	1.34074	0.892615
421	2.14614	1.33724	0.892307
422	2.14023	1.33387	0.961473
423	2.13479	1.33067	0.983589
424	2.13069	1.328	0.92997
425	2.13117	1.32694	0.844023
426	2.13374	1.32713	0.889848
427	2.13549	1.32748	0.915972
428	2.13825	1.32829	0.864137
429	2.1458	1.33113	0.89489
430	2.15279	1.33448	0.911064
431	2.16466	1.33987	0.931753
432	2.1806	1.34769	1.05418
433	2.19818	1.35697	1.03376
434	2.27964	1.39902	0.595615
435	2.30855	1.41947	0.826131
436	2.32728	1.43473	0.98091
437	2.32694	1.44032	1.39609
438	2.3174	1.43944	0.888797
439	2.30442	1.43516	0.849393
440	2.29123	1.42946	1.04159
441	2.31944	1.44305	0.854804
442	2.31248	1.44171	0.908925
443	2.30195	1.43764	0.953458
444	2.29035	1.43224	0.962564
445	2.27868	1.42625	0.932773
446	2.2674	1.42009	0.922959
447	2.2567	1.414	0.916664
448	2.24659	1.40807	0.92354
449	2.23708	1.40235	0.894144
450	2.22811	1.39687	0.860852
451	2.21997	1.39173	0.863894
452	2.22089	1.38987	0.910115
453	2.23538	1.39476	0.958238
454	2.25353	1.40314	0.87153
455	2.28104	1.41651	1.20301
456	2.34256	1.45035	0.768656
457	2.42513	1.49384	0.823026
458	2.44599	1.51629	0.878342
459	2.42608	1.5135	1.01649
460	2.40118	1.50371	0.968945
461	2.37708	1.49194	1.04168
462	2.355	1.47997	1.09006
463	2.33514	1.46853	1.14519
464	2.31733	1.45787	1.34709
465	2.28769	1.4395	0.908955
466	2.27533	1.43166	0.955816
467	2.26402	1.42443	0.933636
468	2.25359	1.41773	0.956271
469	2.24391	1.41147	0.950714
470	2.23486	1.40561	0.929018
471	2.22636	1.40008	0.953778
472	2.21835	1.39486	0.908159
473	2.21077	1.3899	0.873889
474	2.20357	1.38518	0.925024
475	2.1967	1.38066	1.08074
476	2.18424	1.37217	0.755922
477	2.19298	1.37343	0.99426
478	2.20505	1.3781	0.919608
479	2.21035	1.3809	0.786098
480	2.21012	1.38126	0.998348
481	2.20638	1.37975	0.957093
482	2.20067	1.37692	1.18399
483	2.19394	1.37332	0.882291
484	2.18696	1.3694	1.04842
485	2.17313	1.36123	0.976732
486	2.16673	1.35732	0.839696
487	2.16071	1.35356	0.892141
488	2.15513	1.35002	0.935544
489	2.14978	1.34658	0.903278
490	2.14466	1.34326	0.896571
491	2.13973	1.34005	0.880332
492	2.13499	1.33694	0.903842
493	2.13042	1.33393	0.893787
494	2.12601	1.33102	0.904707
495	2.12174	1.32818	0.858234
496	2.1176	1.32543	0.872198
497	2.11356	1.32275	0.859725
498	2.1095	1.32006	0.853379
499	2.10548	1.3174	1.18301
500	2.14134	1.32531	0.716834
501	2.24931	1.36815	0.735296
502	2.32085	1.4105	0.832902
503	2.33559	1.42935	0.959701
504	2.3301	1.4349	1.09375
505	2.31704	1.43348	1.2325
506	2.30191	1.42877	1.2706
507	2.28711	1.42278	1.23045
508	2.24885	1.40373	0.91219
509	2.2384	1.39793	0.888705
510	2.22874	1.3924	0.920265
511	2.21976	1.38714	0.899385
512	2.21136	1.38214	0.915469
513	2.20347	1.37739	0.937
514	2.19603	1.37286	0.886135
515	2.18898	1.36853	0.880443
516	2.18228	1.36439	0.902451
517	2.1759	1.36041	0.953774
518	2.16977	1.35658	0.935437
519	2.16375	1.3528	1.04737
520	2.15518	1.34651	0.865294
521	2.15584	1.34544	0.714452
522	2.15901	1.34565	0.836671
523	2.15997	1.34541	0.96431
524	2.1586	1.34439	0.940587
525	2.15543	1.34259	1.02905
526	2.15125	1.3403	1.03599
527	2.14648	1.33765	1.03451
528	2.14151	1.33484	0.952502
529	2.13136	1.32892	0.830459
530	2.12659	1.32605	0.906118
531	2.12212	1.32332	0.839018
532	2.11776	1.32062	0.863604
533	2.11352	1.31796	0.879375
534	2.10941	1.31536	0.877368
535	2.10543	1.31282	0.884377
536	2.10157	1.31035	0.873487
537	2.09783	1.30795	0.885687
538	2.09421	1.30562	0.86566
539	2.0907	1.30335	0.915672
540	2.08727	1.30114	1.16789
541	2.092	1.2998	0.749213
542	2.1283	1.31155	0.925945
543	2.15491	1.32422	0.95859
544	2.169	1.33321	1.00965
545	2.17476	1.33861	0.893602
546	2.17985	1.34288	0.91296
547	2.19435	1.34981	0.981985
548	2.20735	1.35703	0.968275
549	2.21229	1.3616	1.04282
550	2.21125	1.36335	1.10506
551	2.20678	1.36303	1.44751
552	2.19431	1.35926	0.933277
553	2.18766	1.35658	0.918177
554	2.18099	1.35358	0.923184
555	2.17442	1.35042	0.926466
556	2.16806	1.34718	0.890615
557	2.16191	1.34394	0.885801
558	2.15601	1.34072	0.895539
559	2.15034	1.33755	0.877664
560	2.14489	1.33445	0.869278
561	2.13967	1.33143	0.906951
562	2.13461	1.32846	1.17613
563	2.14174	1.32747	0.757148
564	2.17548	1.33947	0.865769
565	2.19524	1.35005	0.892526
566	2.20323	1.35639	0.868818
567	2.20383	1.3591	0.937434
568	2.20009	1.3592	0.940206
569	2.19389	1.35747	0.96912
570	2.18636	1.35454	0.98737
571	2.17818	1.35082	1.0085
572	2.16974	1.3466	1.05938
573	2.16146	1.34221	1.20648
574	2.1469	1.33406	0.933806
575	2.14071	1.33043	0.949248
576	2.13489	1.32695	0.926666
577	2.12941	1.32363	0.918733
578	2.12422	1.32045	0.905326
579	2.11929	1.31741	0.90768
580	2.11467	1.31452	0.884688
581	2.11067	1.31189	0.887331
582	2.10707	1.30948	0.873714
583	2.10396	1.30731	0.907559
584	2.10158	1.30549	1.12944
585	2.20789	1.33863	0.74866
586	2.28667	1.38168	0.874179
587	2.30724	1.40343	0.925979
588	2.30667	1.41223	0.921092
589	2.29726	1.41371	0.927876
590	2.28465	1.41121	0.9927
591	2.27197	1.4069	1.04425
592	2.25927	1.40156	1.0707
593	2.24721	1.39592	0.688
594	2.23575	1.39014	0.918904
595	2.20575	1.37364	0.928862
596	2.19751	1.36883	0.920892
597	2.18979	1.36425	0.930255
598	2.18253	1.35988	0.918823
599	2.17567	1.35571	0.943887
600	2.16917	1.35173	0.924501
601	2.16297	1.34792	0.894421
602	2.15706	1.34426	0.831933
603	2.1514	1.34073	0.870071
604	2.14597	1.33733	0.867278
605	2.14356	1.33497	0.913773
606	2.15498	1.3375	0.92691
607	2.1827	1.34719	0.853401
608	2.21794	1.36266	1.30284
609	2.32807	1.42216	0.640408
610	2.33948	1.43605	0.794883
611	2.33327	1.43942	1.04755
612	2.32036	1.43706	1.13966
613	2.27823	1.41961	0.85414
614	2.26583	1.4132	0.870833
615	2.25457	1.40708	0.932584
616	2.2449	1.40139	0.92044
617	2.24843	1.4005	0.919052
618	2.25956	1.40413	0.8877
619	2.2661	1.40741	0.89617
620	2.26599	1.40834	0.880938
621	2.26149	1.40711	0.894521
622	2.25467	1.40441	0.908831
623	2.24679	1.40081	0.910023
624	2.24085	1.39755	0.914284
625	2.2416	1.39685	0.994041
626	2.29614	1.41612	0.809299
627	2.417	1.47313	0.818296
628	2.43834	1.49986	0.950147
629	2.41996	1.50031	0.912489
630	2.39576	1.49265	0.95026
631	2.37203	1.48226	1.02433
632	2.35039	1.47134	1.02281
633	2.33082	1.46065	1.86662
634	2.28201	1.42946	0.879332
635	2.28039	1.42719	0.942484
636	2.27531	1.42401	0.964908
637	2.26802	1.4199	0.941499
638	2.2597	1.41523	0.909631
639	2.25104	1.41028	0.925926
640	2.24241	1.40525	0.896047
641	2.234	1.40025	0.919399
642	2.22589	1.39536	0.890999
643	2.21811	1.3906	0.918509
644	2.21066	1.386	0.916968
645	2.20354	1.38155	0.905063
646	2.19658	1.37717	1.15867
647	2.19592	1.37176	0.741175
648	2.24405	1.38791	0.872035
649	2.31192	1.42015	0.895619
650	2.32976	1.43613	0.954302
651	2.32709	1.4406	0.947585
652	2.31646	1.43898	1.39516
653	2.26484	1.41605	0.760225
654	2.25373	1.40996	0.886072
655	2.24363	1.40421	0.95846
656	2.23424	1.39871	0.920175
657	2.22545	1.39348	0.876504
658	2.21719	1.38849	0.891664
659	2.20939	1.38372	0.878299
660	2.20201	1.37916	0.870178
661	2.195	1.37479	0.899414
662	2.18834	1.37061	0.917347
663	2.18198	1.36659	0.897947
664	2.17587	1.36271	1.10307
665	2.24469	1.38671	0.736011
666	2.25586	1.39547	1.24422
667	2.25636	1.39877	0.795186
668	2.25167	1.39872	0.942791
669	2.24414	1.39641	0.884746
670	2.24118	1.39472	0.99206
671	2.25671	1.3999	1.10009
672	2.26561	1.40495	1.06703
673	2.26018	1.40539	0.815754
674	2.25285	1.40273	0.957972
675	2.24467	1.39918	0.988339
676	2.23618	1.39511	0.952894
677	2.22776	1.39078	0.96793
678	2.21956	1.38637	0.876592
679	2.21167	1.38198	0.859642
680	2.20411	1.37765	0.937005
681	2.1969	1.37342	0.9454
682	2.19001	1.36932	0.933268
683	2.18343	1.36535	0.928453
684	2.1771	1.36149	0.941578
685	2.16467	1.35383	0.791171
686	2.16267	1.35116	0.792595
687	2.1722	1.35318	1.03377
688	2.17957	1.35585	0.8998
689	2.1824	1.35723	0.871073
690	2.18123	1.35693	0.931507
691	2.17743	1.35528	0.996346
692	2.17204	1.35267	0.992
693	2.1657	1.34937	1.29263
694	2.15907	1.34576	0.959797
695	2.15253	1.34208	1.33814
696	2.14047	1.33501	0.974548
697	2.13525	1.33183	0.939043
698	2.13023	1.32873	0.893235
699	2.12542	1.32572	0.886675
700	2.12079	1.32279	0.930985
701	2.11634	1.31997	0.906371
702	2.11206	1.31723	0.892932
703	2.10793	1.31458	0.886367
704	2.10394	1.312	0.860987
705	2.10008	1.30951	0.92825
706	2.09632	1.30708	1.03228
707	2.08907	1.30223	0.761314
708	2.11023	1.30671	0.86882
709	2.15577	1.32334	0.928453
710	2.18188	1.33757	0.938919
711	2.19335	1.34641	1.00658
712	2.19591	1.35084	0.977226
713	2.19331	1.35211	1.02788
714	2.1878	1.35125	1.06147
715	2.18067	1.34894	1.12213
716	2.17291	1.3458	1.10008
717	2.16514	1.34228	1.33261
718	2.15773	1.33868	0.752138
719	2.15098	1.33523	0.924986
720	2.14489	1.33199	0.9433
721	2.13911	1.3288	0.94116
722	2.13364	1.3257	0.938333
723	2.12844	1.32269	0.927833
724	2.12349	1.31979	0.904407
725	2.11877	1.31698	0.899548
726	2.11425	1.31426	0.884786
727	2.10991	1.31163	0.875498
728	2.10574	1.30909	0.899078
729	2.1017	1.30662	1.0826
730	2.11735	1.30797	0.718985
731	2.20142	1.33811	0.869911
732	2.24729	1.36581	0.89383
733	2.26344	1.38101	0.908121
734	2.26436	1.38769	0.94074
735	2.25789	1.38911	1.0685
736	2.24804	1.38734	0.916457
737	2.23686	1.38363	1.00937
738	2.22532	1.37895	1.05403
739	2.21395	1.37367	1.09864
740	2.20316	1.36823	1.25021
741	2.18474	1.35831	0.925609
742	2.17699	1.35391	0.951891
743	2.16978	1.34973	0.936705
744	2.16305	1.34575	0.935436
745	2.15673	1.34197	0.905341
746	2.15076	1.33836	0.898042
747	2.1451	1.33491	0.896597
748	2.13971	1.33161	0.883809
749	2.13457	1.32845	0.892278
750	2.12964	1.32541	0.893957
751	2.1249	1.32247	1.03904
752	2.13195	1.32127	0.673367
753	2.17995	1.33795	0.833018
754	2.20942	1.35369	0.884964
755	2.22159	1.36326	0.917857
756	2.22343	1.36773	1.01349
757	2.21955	1.36863	0.902551
758	2.21269	1.3672	0.973163
759	2.20446	1.36442	1.05125
760	2.19537	1.36056	0.991724
761	2.18661	1.35634	1.06772
762	2.18819	1.35498	1.25123
763	2.21413	1.3651	0.905831
764	2.2173	1.36813	0.931858
765	2.21586	1.36904	0.903333
766	2.21176	1.36837	0.922121
767	2.20623	1.36664	0.893521
768	2.19998	1.3642	0.875939
769	2.19346	1.36134	0.873588
770	2.18689	1.35823	0.875797
771	2.18041	1.35497	0.868985
772	2.17409	1.35166	0.874242
773	2.16793	1.34831	1.06458
774	2.21701	1.36033	0.724493
775	2.28698	1.39495	0.829359
776	2.30859	1.4133	0.875964
777	2.30867	1.42	0.885397
778	2.29974	1.42019	0.922358
779	2.28741	1.41688	0.951559
780	2.27405	1.41168	0.975021
781	2.26061	1.40544	0.975539
782	2.24717	1.39851	0.991209
783	2.23421	1.39137	1.02969
784	2.22201	1.38436	1.04543
785	2.20132	1.37202	0.890707
786	2.19288	1.36681	0.926047
787	2.18509	1.36195	0.911475
788	2.17785	1.3574	0.893699
789	2.17107	1.35312	0.874773
790	2.16469	1.34909	0.864171
791	2.15865	1.34526	0.846875
792	2.15292	1.34162	0.842326
793	2.14746	1.33815	0.832496
794	2.14224	1.33483	0.85342
795	2.13721	1.33164	1.00556
796	2.14037	1.32978	0.705037
797	2.15958	1.33593	0.864654
798	2.17181	1.34149	0.847819
799	2.17673	1.34474	0.854548
800	2.17692	1.346	0.877285
801	2.17429	1.34577	0.919676
802	2.16986	1.34432	0.955235
803	2.16375	1.34166	0.966787
804	2.1563	1.33795	1.08252
805	2.14184	1.33008	0.819133
806	2.13541	1.32641	0.897833
807	2.12955	1.32297	0.90068
808	2.12426	1.3198	0.862043
809	2.11926	1.31674	0.872629
810	2.1145	1.31381	0.846564
811	2.10997	1.31099	0.816341
812	2.10563	1.30828	0.846276
813	2.10147	1.30567	0.858106
814	2.09747	1.30316	0.811311
815	2.09361	1.30073	0.810976
816	2.08988	1.29837	0.79702
817	2.08622	1.29607	0.890395
818	2.0825	1.29375	1.11249
819	2.07893	1.29146	0.469014
820	2.08452	1.29174	0.773009
821	2.10142	1.29652	0.824653
822	2.11435	1.30167	0.834573
823	2.12162	1.30553	0.859013
824	2.1245	1.30786	0.892927
825	2.1243	1.30876	0.942779
826	2.12144	1.30813	0.950515
827	2.11702	1.30646	0.883466
828	2.11193	1.30426	0.877234
829	2.10636	1.30162	0.983587
830	2.0959	1.29636	0.741637
831	2.0916	1.2941	0.806673
832	2.08742	1.29181	0.88777
833	2.08336	1.28954	0.761318
834	2.07944	1.28729	0.790005
835	2.07565	1.28508	0.846133
836	2.07199	1.28291	0.850425
837	2.06845	1.28079	0.869709
838	2.06575	1.2789	0.85937
839	2.06656	1.27808	0.845013
840	2.07112	1.27875	0.875759
841	2.07612	1.28011	0.860026
842	2.08366	1.28253	0.896105
843	2.10511	1.28981	0.754941
844	2.1826	1.3226	1.21432
845	2.25304	1.35487	0.700112
846	2.31842	1.39416	0.852284
847	2.33236	1.4142	1.00381
848	2.32644	1.4212	1.31517
849	2.28423	1.41319	0.927551
850	2.27046	1.40754	0.91563
851	2.25789	1.40176	0.890401
852	2.24645	1.39607	0.899035
853	2.23587	1.3905	0.897205
854	2.22606	1.38512	0.887443
855	2.2169	1.37995	0.894266
856	2.20833	1.37499	0.905544
857	2.20027	1.37025	0.88155
858	2.19265	1.3657	0.858705
859	2.18544	1.36135	0.868341
860	2.17859	1.35717	0.867155
861	2.17206	1.35316	0.899684
862	2.16589	1.34934	1.02767
863	2.16432	1.34704	1.01263
864	2.2473	1.37511	0.792866
865	2.34846	1.42306	1.10305
866	2.38234	1.45235	0.898652
867	2.37587	1.46072	0.719615
868	2.35965	1.45948	1.07939
869	2.34601	1.45579	1.20256
870	2.29614	1.43361	0.788108
871	2.28336	1.42674	0.86671
872	2.27154	1.42011	0.909549
873	2.26048	1.41372	0.910399
874	2.25014	1.40761	0.905014
875	2.24046	1.40178	0.877811
876	2.23135	1.39623	0.888704
877	2.22276	1.39095	0.888588
878	2.21464	1.3859	0.884777
879	2.20695	1.38108	0.907239
880	2.19963	1.37646	0.911174
881	2.19266	1.37203	0.92847
882	2.18608	1.36783	1.10056
883	2.18538	1.36573	0.528626
884	2.22234	1.37599	1.06654
885	2.36674	1.43604	1.08913
886	2.42147	1.47935	1.17623
887	2.41293	1.48826	0.859848
888	2.39278	1.48523	0.751295
889	2.3717	1.47787	1.20736
890	2.37371	1.4771	0.768838
891	2.38299	1.48226	0.965888
892	2.3731	1.47964	1.22813
893	2.32469	1.45646	0.907305
894	2.31008	1.44834	0.941248
895	2.29659	1.44055	0.916237
896	2.28412	1.43317	0.906918
897	2.27257	1.4262	0.937711
898	2.26183	1.41962	0.892788
899	2.25181	1.41341	0.896116
900	2.24242	1.40753	0.893058
901	2.2336	1.40198	0.921887
902	2.2253	1.39671	0.919969
903	2.21741	1.39169	0.96131
904	2.2026	1.38212	0.662722
905	2.21171	1.38254	0.816858
906	2.2481	1.39545	0.941071
907	2.26503	1.4051	0.925298
908	2.26774	1.40883	0.919106
909	2.263	1.40837	1.03248
910	2.25465	1.40534	1.14118
911	2.24509	1.40106	0.984515
912	2.23527	1.39619	0.828699
913	2.22544	1.39098	1.04521
914	2.19894	1.37581	0.937564
915	2.19168	1.37141	0.758757
916	2.18482	1.36718	0.904318
917	2.1783	1.36312	0.976074
918	2.17211	1.35921	0.976814
919	2.16649	1.35552	0.922254
920	2.16505	1.3534	0.91152
921	2.16732	1.35296	0.919391
922	2.17207	1.35384	0.896453
923	2.18276	1.35751	0.91797
924	2.19194	1.3616	0.911129
925	2.19887	1.36524	0.938542
926	2.20853	1.36972	0.910643
927	2.23687	1.38149	1.03832
928	2.38126	1.4488	0.849693
929	2.53585	1.53591	0.80954
930	2.5834	1.58748	0.911667
931	2.54502	1.58532	1.04681
932	2.49505	1.56435	0.98274
933	2.45469	1.54357	1.0643
934	2.42177	1.52494	1.17273
935	2.37159	1.49479	0.825426
936	2.35193	1.48261	0.942177
937	2.3348	1.47187	0.999438
938	2.31943	1.46217	0.962453
939	2.30548	1.45331	0.948092
940	2.2927	1.44515	0.930902
941	2.28091	1.43758	0.936478
942	2.26998	1.43053	0.923453
943	2.25979	1.42392	0.916097
944	2.25025	1.4177	0.890135
945	2.24129	1.41184	0.901653
946	2.23281	1.40627	0.997758
947	2.22461	1.40089	1.12411
948	2.22703	1.39695	0.926681
949	2.28021	1.41651	0.929315
950	2.3076	1.43253	0.766001
951	2.31129	1.43808	0.806887
952	2.30446	1.43729	1.08606
953	2.2934	1.43314	0.924275
954	2.28108	1.42746	1.11586
955	2.26864	1.42109	1.25299
956	2.23568	1.4025	0.862294
957	2.22648	1.39698	0.949185
958	2.2181	1.39184	0.951878
959	2.21025	1.38696	0.94113
960	2.20283	1.3823	0.863
961	2.19581	1.37785	0.900829
962	2.18913	1.37358	0.908746
963	2.18276	1.36949	0.936528
964	2.17668	1.36556	0.931126
965	2.17086	1.36178	0.886694
966	2.16527	1.35814	0.89975
967	2.15987	1.3546	0.967219
968	2.15315	1.34858	0.727406
969	2.25405	1.38067	0.838967
970	2.35349	1.43357	0.933975
971	2.36897	1.45401	0.903482
972	2.35977	1.45847	1.14424
973	2.34363	1.45549	0.925125
974	2.32626	1.44935	1.02609
975	2.30904	1.4417	1.18752
976	2.29306	1.43373	1.1175
977	2.2786	1.426	1.08614
978	2.24255	1.40521	0.818262
979	2.23293	1.39937	0.900788
980	2.22401	1.39388	0.924945
981	2.21568	1.3887	0.918229
982	2.20786	1.38382	0.927746
983	2.20049	1.37919	0.895645
984	2.19351	1.37478	0.893117
985	2.18688	1.37059	0.909693
986	2.18057	1.36658	0.869922
987	2.17455	1.36273	0.901552
988	2.16873	1.35901	1.17901
989	2.15765	1.35175	0.771943
990	2.16135	1.35112	0.862482
991	2.16864	1.35293	0.888969
992	2.17176	1.35385	0.926392
993	2.17113	1.35345	0.968028
994	2.16786	1.35183	0.985215
995	2.16288	1.34926	1.02534
996	2.15682	1.34597	1.05535
997	2.15003	1.34212	1.09689
998	2.14279	1.33786	1.13298
999	2.13559	1.33351	1.31913
1000	2.12313	1.32574	0.923179
1001	2.11809	1.32247	0.94993
1002	2.11332	1.31933	0.932542
1003	2.1088	1.31634	0.937553
1004	2.10451	1.31348	0.92042
1005	2.10041	1.31075	0.903959
1006	2.0965	1.30815	0.906316
1007	2.09274	1.30565	0.896353
1008	2.08913	1.30324	0.896931
1009	2.08565	1.30093	0.903251
1010	2.08222	1.29867	1.07128
1011	2.07896	1.29645	1.74756
1012	2.0864	1.297	0.720216
1013	2.11462	1.30582	0.883447
1014	2.1355	1.31526	0.90044
1015	2.14667	1.32194	0.966418
1016	2.15108	1.32588	1.03421
1017	2.15091	1.32746	0.948066
1018	2.14781	1.32724	1.01429
1019	2.14298	1.32578	0.992862
1020	2.13713	1.32347	0.960418
1021	2.13103	1.32076	1.01323
1022	2.1249	1.31784	1.16958
1023	2.11379	1.31217	0.716198
1024	2.10908	1.30963	0.915796
1025	2.10454	1.30709	0.953707
1026	2.10071	1.3047	0.95556
1027	2.12197	1.30961	0.91287
1028	2.19139	1.33414	0.893627
1029	2.24187	1.36137	0.910053
1030	2.2659	1.38005	0.93308
1031	2.27865	1.39263	0.923314
1032	2.29164	1.40382	0.907235
1033	2.29452	1.41034	0.91839
1034	2.2906	1.41254	0.966662
1035	2.29974	1.41793	1.07413
1036	2.39233	1.46352	0.867795
1037	2.49353	1.52006	0.999583
1038	2.50465	1.54459	0.879535
1039	2.47027	1.53676	1.02994
1040	2.43576	1.52247	1.14584
1041	2.40565	1.50742	1.34722
1042	2.322	1.45896	0.834982
1043	2.307	1.4497	0.928539
1044	2.29356	1.44129	0.950084
1045	2.28123	1.43353	0.927729
1046	2.26985	1.42631	0.924355
1047	2.25927	1.41957	0.968451
1048	2.2494	1.41325	0.915446
1049	2.24014	1.4073	0.90076
1050	2.23143	1.40168	0.895615
1051	2.22321	1.39635	0.905096
1052	2.21542	1.39128	0.901896
1053	2.20799	1.38644	0.978985
1054	2.20428	1.38067	0.687083
1055	2.25024	1.39571	0.891853
1056	2.31206	1.42469	0.963243
1057	2.32981	1.43978	0.964477
1058	2.32767	1.44394	0.879901
1059	2.31766	1.44229	0.84807
1060	2.30701	1.43829	1.26699
1061	2.31877	1.44201	0.955797
1062	2.31786	1.44452	0.848379
1063	2.30784	1.4407	0.95291
1064	2.29632	1.43545	0.942236
1065	2.28457	1.42955	0.91951
1066	2.27337	1.42357	0.899372
1067	2.26272	1.41763	0.967817
1068	2.25266	1.41184	0.96626
1069	2.24318	1.40626	0.92042
1070	2.23604	1.40153	0.92115
1071	2.23573	1.39955	0.896066
1072	2.24094	1.40046	0.868881
1073	2.2439	1.40141	0.848347
1074	2.24273	1.40096	0.913425
1075	2.23866	1.39915	0.978712
1076	2.23278	1.39631	1.38069
1077	2.22675	1.39302	0.590265
1078	2.2602	1.40217	0.863171
1079	2.37489	1.45263	0.827383
1080	2.40228	1.47749	0.886142
1081	2.39117	1.48088	0.964995
1082	2.37054	1.47575	1.00828
1083	2.34882	1.4672	1.05484
1084	2.32842	1.45751	1.09548
1085	2.30959	1.44756	1.12615
1086	2.29225	1.43777	1.16699
1087	2.27656	1.42854	1.28854
1088	2.25076	1.41277	0.927657
1089	2.24031	1.40618	0.960433
1090	2.23076	1.4001	0.954017
1091	2.22193	1.39446	0.941412
1092	2.21372	1.38918	0.950103
1093	2.20603	1.38423	0.924369
1094	2.19878	1.37957	0.911771
1095	2.19193	1.37515	0.916085
1096	2.18541	1.37094	0.901521
1097	2.1792	1.36692	0.932091
1098	2.1732	1.36304	1.06699
1099	2.17144	1.35823	0.777814
1100	2.21303	1.37204	0.899042
1101	2.24183	1.38614	0.955006
1102	2.251	1.39322	0.983433
1103	2.24953	1.3952	0.924589
1104	2.24317	1.39413	1.09555
1105	2.23431	1.39104	1.21733
1106	2.22404	1.38647	1.63322
1107	2.21398	1.38155	0.879675
1108	2.20857	1.37768	1.29139
1109	2.27899	1.40496	1.01952
1110	2.2874	1.41264	0.97152
1111	2.28459	1.41484	0.897138
1112	2.27691	1.41372	0.945186
1113	2.26735	1.41071	0.970274
1114	2.25731	1.40668	0.945262
1115	2.24738	1.40214	0.911969
1116	2.23783	1.39739	0.911892
1117	2.23043	1.39316	0.919548
1118	2.2286	1.39104	0.930357
1119	2.24376	1.39592	0.927926
1120	2.29991	1.4171	0.956837
1121	2.41279	1.47091	0.967338
1122	2.48794	1.52097	0.981084
1123	2.50734	1.54527	1.12834
1124	2.5172	1.56565	0.636574
1125	2.53814	1.57924	0.915667
1126	2.55836	1.59524	1.37121
1127	2.51759	1.5799	1.27934
1128	2.47565	1.55962	0.677148
1129	2.4403	1.54052	1.07316
1130	2.41582	1.52525	1.16244
1131	2.36056	1.49123	0.944005
1132	2.34342	1.48089	0.938298
1133	2.32769	1.47122	0.993987
1134	2.3133	1.46224	0.974918
1135	2.30009	1.45389	0.922141
1136	2.28792	1.44612	0.929703
1137	2.27665	1.43887	0.933368
1138	2.26617	1.43207	0.905355
1139	2.25636	1.42567	0.909956
1140	2.24714	1.41962	0.942146
1141	2.23845	1.41388	0.925453
1142	2.23005	1.40832	0.912803
1143	2.22443	1.40391	1.4325
1144	2.22674	1.40273	0.50554
1145	2.26208	1.41455	0.772736
1146	2.34203	1.44926	0.912352
1147	2.37755	1.47142	1.1038
1148	2.37316	1.47538	1.23062
1149	2.3573	1.47188	0.99431
1150	2.33926	1.46488	1.0316
1151	2.32146	1.45643	1.10805
1152	2.3066	1.44837	1.06496
1153	2.30192	1.44206	0.776257
1154	2.30401	1.44253	0.910024
1155	2.29923	1.44053	0.934095
1156	2.29079	1.43655	1.01079
1157	2.28094	1.43152	0.966401
1158	2.27078	1.42602	0.931109
1159	2.26077	1.4204	0.955683
1160	2.25113	1.41482	0.93593
1161	2.24193	1.40938	0.902957
1162	2.23317	1.40409	0.889082
1163	2.22485	1.39898	0.914253
1164	2.21694	1.39406	0.971795
1165	2.20921	1.38921	0.979822
1166	2.21636	1.38645	0.671605
1167	2.2601	1.40213	0.876356
1168	2.3525	1.44426	0.954544
1169	2.38051	1.46815	1.09852
1170	2.37297	1.47229	1.43042
1171	2.35522	1.46759	0.941099
1172	2.28758	1.43481	0.840585
1173	2.27456	1.42734	0.930589
1174	2.26295	1.42049	0.914305
1175	2.25228	1.41406	0.941127
1176	2.24238	1.408	0.961254
1177	2.23314	1.40228	0.947016
1178	2.22465	1.39691	0.914939
1179	2.2183	1.39242	0.904051
1180	2.21294	1.38858	0.905914
1181	2.20737	1.38487	0.903006
1182	2.20165	1.38117	0.918487
1183	2.19785	1.37817	1.01952
1184	2.20964	1.3796	0.655636
1185	2.27261	1.40234	0.851812
1186	2.38023	1.45458	0.880715
1187	2.40197	1.47917	1.16116
1188	2.38942	1.48206	1.12274
1189	2.36944	1.47667	0.896399
1190	2.34908	1.46835	0.851872
1191	2.33003	1.45915	0.972959
1192	2.31248	1.44988	0.985678
1193	2.29654	1.44097	1.24826
1194	2.26915	1.42487	0.894793
1195	2.25769	1.4179	0.945718
1196	2.24738	1.41153	0.94439
1197	2.23781	1.40557	0.949192
1198	2.22889	1.39998	0.940276
1199	2.22054	1.39471	0.976949
1200	2.21267	1.38972	0.964755
1201	2.20523	1.38499	0.92192
1202	2.19815	1.38047	0.886778
1203	2.19141	1.37614	0.904494
1204	2.18495	1.37199	0.912848
1205	2.17877	1.368	1.15377
1206	2.16758	1.36035	0.783735
1207	2.21441	1.37341	1.02626
1208	2.28743	1.40597	1.02965
1209	2.31034	1.42389	0.839638
1210	2.30959	1.42982	0.88051
1211	2.29947	1.42898	0.887167
1212	2.28625	1.42476	0.952365
1213	2.27241	1.41893	1.24403
1214	2.25884	1.41233	1.08645
1215	2.2462	1.40566	0.923593
1216	2.22358	1.39284	0.798063
1217	2.21406	1.38719	0.927894
1218	2.20562	1.38205	0.96973
1219	2.19777	1.37719	0.923027
1220	2.1904	1.37257	0.953952
1221	2.18345	1.36818	0.948819
1222	2.17686	1.36399	0.913636
1223	2.17059	1.35998	0.901032
1224	2.16462	1.35614	0.909672
1225	2.15891	1.35245	0.925151
1226	2.15345	1.34891	0.906201
1227	2.14821	1.34551	1.00896
1228	2.13786	1.3388	0.761708
1229	2.13977	1.33765	1.03032
1230	2.14715	1.33911	0.777629
1231	2.15174	1.34045	1.07425
1232	2.1525	1.34072	0.989541
1233	2.15037	1.33978	1.19791
1234	2.14628	1.33781	0.891917
1235	2.14118	1.33519	0.96688
1236	2.13537	1.33207	1.28895
1237	2.11857	1.32251	0.897034
1238	2.11384	1.31967	0.927941
1239	2.10947	1.31698	0.947619
1240	2.10525	1.31434	0.965788
1241	2.10119	1.31178	0.928115
1242	2.09726	1.30928	0.914728
1243	2.09347	1.30685	0.924905
1244	2.0898	1.30449	0.890684
1245	2.08624	1.3022	0.911699
1246	2.08279	1.29998	0.917615
1247	2.07945	1.29781	0.906487
1248	2.0762	1.2957	1.00102
1249	2.07284	1.29355	1.37763
1250	2.06926	1.29126	0.580405
1251	2.06822	1.28956	0.812948
1252	2.08137	1.29211	0.959153
1253	2.10531	1.30016	0.94178
1254	2.1225	1.30819	0.986138
1255	2.13147	1.31387	1.04962
1256	2.13436	1.3169	1.05179
1257	2.13323	1.31774	1.05649
1258	2.1299	1.31719	1.26458
1259	2.12119	1.31424	0.902553
1260	2.11687	1.31246	0.963269
1261	2.11261	1.31054	0.97384
1262	2.10834	1.30847	0.947939
1263	2.10418	1.30633	0.941184
1264	2.10096	1.30438	0.948757
1265	2.09919	1.30293	0.93119
1266	2.09797	1.30182	0.924568
1267	2.09648	1.30076	0.933559
1268	2.09454	1.29961	0.917798
1269	2.09219	1.29831	0.916139
1270	2.08954	1.29688	0.930547
1271	2.08669	1.29533	0.954851
1272	2.08427	1.29378	1.07943
1273	2.10169	1.29747	0.733838
1274	2.15234	1.31421	0.862688
1275	2.22658	1.34735	0.993357
1276	2.26188	1.37239	1.14991
1277	2.26969	1.38489	0.95635
1278	2.26522	1.38934	0.862503
1279	2.25534	1.38897	1.00787
1280	2.24346	1.38592	1.10342
1281	2.231	1.38133	1.23444
1282	2.20847	1.37115	0.877517
1283	2.19892	1.36631	0.997265
1284	2.19034	1.36173	1.01007
1285	2.18239	1.35732	1.00424
1286	2.17497	1.3531	0.876422
1287	2.168	1.34904	0.90347
1288	2.16142	1.34515	0.890973
1289	2.15519	1.34142	0.895681
1290	2.14925	1.33782	0.922417
1291	2.14359	1.33436	0.918456
1292	2.13817	1.33103	0.924938
1293	2.13297	1.32781	0.963258
1294	2.12779	1.3246	0.975868
1295	2.12484	1.322	1.02261
1296	2.13779	1.32442	1.01524
1297	2.23335	1.36215	0.689469
1298	2.309	1.3989	0.890971
1299	2.41952	1.45938	0.959638
1300	2.46866	1.50456	1.08999
1301	2.45054	1.5122	1.17048
1302	2.41925	1.50411	1.68127
1303	2.36479	1.4794	0.824026
1304	2.34347	1.46777	0.92196
1305	2.32525	1.45729	0.897604
1306	2.30934	1.44782	0.949802
1307	2.29508	1.43917	0.917768
1308	2.28213	1.4312	0.937841
1309	2.27026	1.42382	0.937985
1310	2.25927	1.41695	0.913489
1311	2.24906	1.41052	0.928243
1312	2.23951	1.40448	0.896776
1313	2.23055	1.39879	0.892538
1314	2.22211	1.39341	0.932936
1315	2.21414	1.38831	1.0844
1316	2.19864	1.37842	0.787951
1317	2.19312	1.37421	0.97898
1318	2.19378	1.37244	1.12519
1319	2.19429	1.37145	0.802088
1320	2.19185	1.36964	0.984904
1321	2.18689	1.36675	1.0041
1322	2.18054	1.36309	0.970971
1323	2.17342	1.35896	1.10237
1324	2.16591	1.3545	1.12952
1325	2.15839	1.3499	1.29466
1326	2.14469	1.34129	0.912988
1327	2.13891	1.33753	1.05534
1328	2.13369	1.33407	1.03737
1329	2.12874	1.33076	0.922605
1330	2.12402	1.3276	0.926616
1331	2.11952	1.32457	0.932436
1332	2.1152	1.32166	0.923271
1333	2.11105	1.31886	0.973121
1334	2.10706	1.31616	0.925697
1335	2.1032	1.31355	0.909606
1336	2.09947	1.31103	0.916116
1337	2.09585	1.30859	1.09553
1338	2.08822	1.30353	0.736301
1339	2.08448	1.30092	0.890684
1340	2.08205	1.29865	0.919902
1341	2.07969	1.29646	0.925607
1342	2.0769	1.29426	1.03891
1343	2.07355	1.29195	1.01278
1344	2.06962	1.28937	1.02807
1345	2.06524	1.28659	1.04255
1346	2.06061	1.28368	1.00653
1347	2.05587	1.28069	1.2336
1348	2.05125	1.27776	1.58659
1349	2.04722	1.27517	0.752991
1350	2.04377	1.2729	0.966209
1351	2.04078	1.27086	1.00527
1352	2.0379	1.26888	0.942247
1353	2.03512	1.26696	0.922719
1354	2.03245	1.26509	0.928246
1355	2.02987	1.26329	0.923472
1356	2.02738	1.26155	0.920528
1357	2.02498	1.25988	0.912462
1358	2.02265	1.25825	0.902429
1359	2.0204	1.25669	0.918694
1360	2.01821	1.25517	1.0544
1361	2.01593	1.25361	2.01393
1362	2.01452	1.2522	0.720035
1363	2.02358	1.25351	0.898394
1364	2.0399	1.25819	0.962324
1365	2.05346	1.26349	0.89464
1366	2.06227	1.26788	1.10201
1367	2.0671	1.27099	0.964686
1368	2.06915	1.27297	0.956605
1369	2.06878	1.27371	1.00053
1370	2.06684	1.27355	1.11355
1371	2.06381	1.27268	1.20903
1372	2.05715	1.2703	0.861595
1373	2.05429	1.2692	0.942317
1374	2.05151	1.26803	0.978625
1375	2.04869	1.26675	0.971359
1376	2.04587	1.26538	0.970856
1377	2.04307	1.26396	0.924972
1378	2.04032	1.26252	0.897812
1379	2.0376	1.26105	0.882097
1380	2.03494	1.25958	0.895996
1381	2.03233	1.25812	0.867788
1382	2.02977	1.25665	0.892247
1383	2.02727	1.2552	1.04756
1384	2.02465	1.25368	1.53177
1385	2.02189	1.25202	0.756304
1386	2.0219	1.25094	0.939023
1387	2.02566	1.25107	0.983454
1388	2.02992	1.25192	0.903219
1389	2.03269	1.25266	0.871193
1390	2.03363	1.2529	0.953877
1391	2.0331	1.25267	0.990061
1392	2.03138	1.25193	1.00266
1393	2.02874	1.25074	1.09485
1394	2.02547	1.24918	1.21203
1395	2.01891	1.24597	0.809743
1396	2.01623	1.24465	0.919929
1397	2.01381	1.2434	0.918392
1398	2.0114	1.24211	0.929767
1399	2.009	1.24078	0.922085
1400	2.00664	1.23945	0.902355
1401	2.00433	1.23813	0.887777
1402	2.00207	1.23681	0.88487
1403	1.99986	1.23551	0.8814
1404	1.99771	1.23424	0.876899
1405	1.99561	1.23298	0.875296
1406	1.99355	1.23175	0.995421
1407	1.99135	1.23043	1.76213
1408	1.98895	1.22897	0.681886
1409	1.9878	1.22766	0.850826
1410	1.9893	1.22701	0.878189
1411	1.99135	1.22672	0.909997
1412	1.99287	1.2266	0.917112
1413	1.99355	1.22649	1.00759
1414	1.99336	1.22622	0.976681
1415	1.99201	1.22541	0.97255
1416	1.98983	1.22424	1.08099
1417	1.98713	1.22281	1.12749
1418	1.98157	1.21991	0.840499
1419	1.97967	1.21895	0.912414
1420	1.97786	1.21801	0.931579
1421	1.97601	1.217	0.891881
1422	1.97414	1.21596	0.865911
1423	1.97226	1.21489	0.874866
1424	1.9704	1.2138	0.883904
1425	1.96857	1.21272	0.873797
1426	1.96676	1.21163	0.864357
1427	1.96498	1.21056	0.861382
1428	1.96324	1.2095	0.852278
1429	1.96153	1.20845	0.933957
1430	1.95971	1.20733	1.6297
1431	1.95764	1.20606	0.739512
1432	1.95617	1.20473	0.862074
1433	1.95687	1.20381	0.88032
1434	1.95838	1.20319	0.906809
1435	1.95981	1.20288	0.912932
1436	1.96076	1.20273	0.925983
1437	1.96114	1.2026	0.937026
1438	1.96048	1.20209	0.972323
1439	1.95915	1.20132	1.074
1440	1.95704	1.20017	1.14673
1441	1.95273	1.19796	0.802304
1442	1.9513	1.19727	0.935518
1443	1.94992	1.19659	0.941389
1444	1.94846	1.19583	0.83159
1445	1.94695	1.19503	0.807988
1446	1.94541	1.19417	0.771067
1447	1.94386	1.1933	1.08712
1448	1.9423	1.1924	0.994887
1449	1.94082	1.19151	0.92803
1450	1.9422	1.19115	0.923352
1451	1.9527	1.19304	0.904625
1452	1.97579	1.19897	0.902605
1453	2.00996	1.21009	0.979603
1454	2.04696	1.22493	0.997172
1455	2.19483	1.28823	0.722617
1456	2.34969	1.3702	0.936031
1457	2.40965	1.4302	1.03148
1458	2.40243	1.45114	0.916813
1459	2.37843	1.45345	0.977799
1460	2.35222	1.44785	0.990384
1461	2.3277	1.43907	1.13813
1462	2.30574	1.42929	1.21029
1463	2.26989	1.41062	0.846609
1464	2.25571	1.40253	0.961501
1465	2.24339	1.39525	0.960214
1466	2.23229	1.38853	0.95543
1467	2.22215	1.38233	0.949388
1468	2.21281	1.37655	0.933931
1469	2.20412	1.37115	0.937021
1470	2.19598	1.36607	0.928015
1471	2.18832	1.36128	0.923275
1472	2.18107	1.35674	0.903075
1473	2.17419	1.35242	0.91472
1474	2.16765	1.34831	1.05069
1475	2.16127	1.34432	1.1449
1476	2.16667	1.3419	0.756247
1477	2.1836	1.34793	0.79133
1478	2.19139	1.3522	0.91511
1479	2.19196	1.35371	1.03615
1480	2.18829	1.35305	0.942985
1481	2.18202	1.35065	0.942713
1482	2.1746	1.34731	1.0375
1483	2.16666	1.34338	1.08775
1484	2.15821	1.33887	1.14381
1485	2.1498	1.33415	1.27929
1486	2.13527	1.3256	0.948334
1487	2.12931	1.32193	0.977648
1488	2.12371	1.31842	0.946802
1489	2.11843	1.31506	0.943821
1490	2.11343	1.31185	0.938934
1491	2.10868	1.30878	0.932708
1492	2.10416	1.30584	0.927666
1493	2.09983	1.30303	0.930386
1494	2.09569	1.30033	0.925576
1495	2.0917	1.29773	0.870078
1496	2.08786	1.29523	0.904196
1497	2.08397	1.29272	1.4135
1498	2.07992	1.29005	0.765272
1499	2.08049	1.28857	0.870889
1500	2.08517	1.28882	0.871051
1501	2.0886	1.28934	0.889018
1502	2.08974	1.28948	0.923239
1503	2.08888	1.28901	0.935141
1504	2.08652	1.28794	0.964323
1505	2.08304	1.28628	1.07967
1506	2.07851	1.28395	1.17476
1507	2.07332	1.28114	1.30005
1508	2.06331	1.27552	0.904053
1509	2.05935	1.27319	0.951485
1510	2.0557	1.27097	0.955563
1511	2.05218	1.26878	0.932501
1512	2.0488	1.26665	0.928121
1513	2.04556	1.26457	0.912754
1514	2.04245	1.26255	0.90279
1515	2.03945	1.2606	0.89239
1516	2.03657	1.25871	0.901937
1517	2.03378	1.25689	0.873652
1518	2.0311	1.25513	0.878789
1519	2.02849	1.25343	0.982749
1520	2.02583	1.25172	1.2626
1521	2.02337	1.25	0.537236
1522	2.02577	1.24939	0.848031
1523	2.03281	1.25051	0.866158
1524	2.03906	1.25209	0.891279
1525	2.04302	1.25349	0.870358
1526	2.04487	1.25453	0.874506
1527	2.04507	1.25514	0.910612
1528	2.04385	1.25514	1.03118
1529	2.04127	1.25433	1.06069
1530	2.03764	1.25277	1.19458
1531	2.03028	1.24934	0.797161
1532	2.02727	1.24791	0.999668
1533	2.0245	1.24653	0.975259
1534	2.02175	1.2451	0.93543
1535	2.01904	1.24363	0.909897
1536	2.01638	1.24215	0.920513
1537	2.01377	1.24066	0.853979
1538	2.01123	1.23919	0.87875
1539	2.00874	1.23772	0.876767
1540	2.00632	1.23627	0.852496
1541	2.00395	1.23484	0.857174
1542	2.00164	1.23343	0.902164
1543	1.99917	1.23194	1.05648
1544	1.99365	1.22854	0.96424
1545	1.99406	1.22745	0.784129
1546	1.99857	1.22765	0.837991
1547	2.00298	1.22822	0.929065
1548	2.00622	1.22894	0.976144
1549	2.00799	1.22944	0.864567
1550	2.00821	1.22949	0.976731
1551	2.00722	1.22909	1.15531
1552	2.00556	1.22842	1.2998
1553	2.00231	1.2273	0.879921
1554	2.00027	1.22646	0.936809
1555	1.99861	1.22581	0.921033
1556	1.99682	1.22504	0.881821
1557	1.99495	1.22418	0.872656
1558	1.99303	1.22325	0.862289
1559	1.99109	1.22227	0.865303
1560	1.98913	1.22126	0.866072
1561	1.98718	1.22023	0.87369
1562	1.98524	1.21917	0.857936
1563	1.98332	1.21812	0.836044
1564	1.98142	1.21705	0.879528
1565	1.97932	1.21587	0.888043
1566	1.98031	1.21441	0.744581
1567	1.99753	1.21793	0.987027
1568	2.02407	1.22615	0.892553
1569	2.04552	1.23537	1.10008
1570	2.05984	1.24348	0.863961
1571	2.06841	1.24979	0.877685
1572	2.07288	1.2544	0.815178
1573	2.0742	1.25739	1.13342
1574	2.07199	1.26032	0.948016
1575	2.06999	1.26099	0.917614
1576	2.0675	1.26114	0.905097
1577	2.06473	1.26092	0.910267
1578	2.06173	1.26037	0.922563
1579	2.05859	1.25957	0.917308
1580	2.05538	1.25856	0.909097
1581	2.05215	1.25741	0.896312
1582	2.04892	1.25615	0.912751
1583	2.04571	1.2548	0.895608
1584	2.04263	1.2534	0.899331
1585	2.04044	1.25218	0.8805
1586	2.04019	1.2515	0.904989
1587	2.04199	1.25154	0.944222
1588	2.10415	1.269	0.600217
1589	2.18278	1.30259	0.960859
1590	2.25472	1.34078	0.89024
1591	2.31541	1.38197	1.21379
1592	2.32813	1.40396	0.824069
1593	2.32064	1.41208	0.811919
1594	2.306	1.41247	1.04462
1595	2.27381	1.40359	0.797608
1596	2.25939	1.39766	0.914945
1597	2.24655	1.3917	0.973294
1598	2.23493	1.38583	0.978088
1599	2.22429	1.38012	0.916222
1600	2.21448	1.37464	0.900453
1601	2.20538	1.36941	0.904574
1602	2.19689	1.36442	0.936413
1603	2.18893	1.35968	0.903132
1604	2.18144	1.35515	0.895032
1605	2.17433	1.35083	0.885266
1606	2.16758	1.34668	0.875065
1607	2.16114	1.3427	0.876142
1608	2.15487	1.33881	0.921906
1609	2.14866	1.33495	0.931348
1610	2.1433	1.33136	0.968111
1611	2.17103	1.337	0.668577
1612	2.32311	1.39226	0.752336
1613	2.53539	1.51924	0.754929
1614	2.52062	1.54786	0.879248
1615	2.47427	1.53812	2.06589
1616	2.43385	1.52124	0.942509
1617	2.4018	1.5048	0.983544
1618	2.37557	1.48997	0.935626
1619	2.35365	1.47692	0.922846
1620	2.33502	1.46551	0.94911
1621	2.31867	1.45533	0.927042
1622	2.30398	1.44611	0.89453
1623	2.29062	1.43767	0.920456
1624	2.27834	1.42989	0.936625
1625	2.267	1.42266	0.906775
1626	2.25644	1.41591	0.934845
1627	2.24658	1.40958	0.913106
1628	2.23732	1.40361	0.919719
1629	2.2286	1.39796	0.864569
1630	2.22037	1.39261	0.981859
1631	2.21238	1.38741	1.06405
1632	2.28635	1.41294	0.681495
1633	2.33646	1.43782	0.780783
1634	2.39127	1.46926	0.923888
1635	2.4037	1.48494	1.03885
1636	2.38846	1.4842	0.931152
1637	2.367	1.47663	1.24166
1638	2.34567	1.46682	1.34549
1639	2.29453	1.43878	0.937512
1640	2.28135	1.43091	1.0292
1641	2.26946	1.42366	0.940568
1642	2.25855	1.41691	0.961745
1643	2.24844	1.4106	0.940609
1644	2.23903	1.40467	0.943632
1645	2.23021	1.39907	0.929485
1646	2.22191	1.39377	0.929699
1647	2.21407	1.38874	0.901661
1648	2.20664	1.38395	0.911378
1649	2.19958	1.37938	0.897857
1650	2.19286	1.375	0.97979
1651	2.18631	1.37074	1.39628
1652	2.18219	1.36721	0.664237
1653	2.23412	1.38233	0.852958
1654	2.41414	1.46034	1.05667
1655	2.50403	1.52754	0.725213
1656	2.48186	1.53697	0.76734
1657	2.44496	1.52629	1.24225
1658	2.41192	1.51155	0.579644
1659	2.38393	1.49693	0.908114
1660	2.38938	1.49372	1.12524
1661	2.41783	1.50668	1.68493
1662	2.38821	1.4971	1.00688
1663	2.36787	1.48691	0.957682
1664	2.34908	1.47663	0.977552
1665	2.33206	1.46685	0.948631
1666	2.31667	1.45772	0.944105
1667	2.30266	1.44923	0.932278
1668	2.28984	1.44134	0.912904
1669	2.27803	1.43397	0.914814
1670	2.26708	1.42709	0.884615
1671	2.25687	1.42061	0.912917
1672	2.24732	1.41451	0.907592
1673	2.23834	1.40874	0.940346
1674	2.22972	1.40318	1.1249
1675	2.21303	1.39243	0.936776
1676	2.20865	1.38849	0.81843
1677	2.21591	1.3892	0.736865
1678	2.22045	1.39022	0.711934
1679	2.21909	1.38933	0.756053
1680	2.21394	1.38666	1.12803
1681	2.207	1.38291	0.956917
1682	2.19988	1.37889	0.708657
1683	2.19223	1.37444	1.06604
1684	2.17762	1.36564	0.901175
1685	2.17135	1.36173	0.981591
1686	2.16546	1.35799	0.965879
1687	2.15984	1.3544	0.936643
1688	2.15446	1.35094	0.97844
1689	2.14931	1.34761	0.982888
1690	2.14436	1.3444	0.874047
1691	2.1396	1.3413	0.93115
1692	2.135	1.33831	0.921187
1693	2.13056	1.3354	0.901819
1694	2.12627	1.33259	0.932597
1695	2.12213	1.32986	1.00841
1696	2.11356	1.32431	0.840609
1697	2.1099	1.32165	0.923258
1698	2.11155	1.32077	0.748027
1699	2.11486	1.32092	0.696939
1700	2.11623	1.32084	0.919086
1701	2.11547	1.32013	0.96567
1702	2.11306	1.31869	0.920596
1703	2.10939	1.31662	0.979207
1704	2.10502	1.31415	0.989727
1705	2.10023	1.31139	1.10547
1706	2.09108	1.30599	1.15514
1707	2.08737	1.30372	1.01529
1708	2.08381	1.30149	1.0086
1709	2.08034	1.29928	1.00158
1710	2.07696	1.29711	0.972694
1711	2.07367	1.29498	1.00277
1712	2.07047	1.29289	0.967033
1713	2.06736	1.29084	0.97234
1714	2.06432	1.28884	0.913169
1715	2.06136	1.28689	0.919093
1716	2.05847	1.28497	0.918306
1717	2.05565	1.2831	0.979345
1718	2.05271	1.28117	1.00093
1719	2.04967	1.27915	1.12444
1720	2.07937	1.28565	0.68886
1721	2.14606	1.3094	0.545012
1722	2.21506	1.3429	0.743778
1723	2.27221	1.37609	0.821624
1724	2.29622	1.39824	0.837149
1725	2.2956	1.40705	0.960524
1726	2.2853	1.40812	1.16259
1727	2.25896	1.40102	0.941274
1728	2.24679	1.39608	1.00083
1729	2.23559	1.39094	1.01202
1730	2.22523	1.38579	1.00427
1731	2.21769	1.3813	0.939392
1732	2.22126	1.38082	0.919342
1733	2.22582	1.38229	0.913572
1734	2.22536	1.38253	0.957633
1735	2.22189	1.38136	1.00138
1736	2.23617	1.38522	0.973853
1737	2.29541	1.4088	0.91284
1738	2.35498	1.44144	0.922365
1739	2.38038	1.46317	0.980911
1740	2.39237	1.47603	0.963817
1741	2.41451	1.49108	1.0949
1742	2.48176	1.53284	1.05052
1743	2.55137	1.5743	0.750886
1744	2.54794	1.58722	0.942739
1745	2.52733	1.58131	0.900177
1746	2.49737	1.56845	1.09064
1747	2.46651	1.55198	1.05017
1748	2.43585	1.53495	1.1553
1749	2.36184	1.49087	0.915532
1750	2.34343	1.47942	0.93492
1751	2.32709	1.46914	0.891115
1752	2.31234	1.45978	0.924899
1753	2.2989	1.4512	0.935103
1754	2.28658	1.44327	0.98249
1755	2.27521	1.43591	0.953653
1756	2.26464	1.42904	0.950211
1757	2.25478	1.42259	0.939586
1758	2.24554	1.41652	0.908931
1759	2.23684	1.41078	0.893175
1760	2.22862	1.40535	0.985784
1761	2.22065	1.40009	1.40087
1762	2.24051	1.40162	1.0022
1763	2.34929	1.44566	0.936768
1764	2.43376	1.49586	0.875225
1765	2.44316	1.51404	0.933243
1766	2.42306	1.51146	0.895231
1767	2.40117	1.50303	0.717311
1768	2.37842	1.49227	1.00871
1769	2.35608	1.48049	1.03852
1770	2.33593	1.46911	1.072
1771	2.3025	1.44923	0.819665
1772	2.28885	1.44084	0.939219
1773	2.27656	1.43319	0.987925
1774	2.2653	1.42612	0.992503
1775	2.25488	1.41953	0.954609
1776	2.24519	1.41337	0.937692
1777	2.23612	1.40757	0.947577
1778	2.2276	1.40211	0.953583
1779	2.21956	1.39694	0.96456
1780	2.21196	1.39203	0.923093
1781	2.20474	1.38736	0.921336
1782	2.19786	1.38289	1.10632
1783	2.18491	1.37429	0.733636
1784	2.2206	1.38315	0.729905
1785	2.306	1.41972	0.44809
1786	2.33442	1.4415	0.616351
1787	2.33202	1.44708	0.910712
1788	2.31929	1.44467	0.853668
1789	2.30425	1.43891	1.08253
1790	2.29554	1.43411	1.27519
1791	2.28004	1.42601	0.857728
1792	2.26969	1.42074	0.968837
1793	2.2591	1.4151	0.95006
1794	2.24906	1.40954	0.924715
1795	2.23955	1.40411	0.936115
1796	2.23053	1.39884	0.941228
1797	2.22202	1.39377	0.93851
1798	2.21396	1.38891	0.932414
1799	2.20633	1.38426	0.924384
1800	2.19908	1.37979	0.850881
1801	2.19218	1.3755	0.928335
1802	2.18559	1.37138	0.874441
1803	2.1793	1.36741	0.894449
1804	2.17327	1.36359	0.961717
1805	2.16742	1.35986	1.11883
1806	2.24489	1.38285	0.63143
1807	2.34305	1.42898	0.635815
1808	2.40674	1.47079	0.852332
1809	2.42026	1.49086	1.02147
1810	2.40112	1.49033	1.07224
1811	2.37605	1.48175	1.12338
1812	2.29844	1.44186	0.947551
1813	2.28471	1.43378	0.986116
1814	2.27237	1.42638	0.982797
1815	2.26108	1.41953	0.951991
1816	2.25066	1.41316	0.978522
1817	2.24096	1.40719	0.974615
1818	2.2319	1.40157	0.916492
1819	2.22337	1.39626	0.878779
1820	2.21532	1.39122	0.948229
1821	2.20769	1.38641	0.952299
1822	2.20044	1.38181	0.949894
1823	2.19354	1.3774	0.954308
1824	2.18684	1.37312	1.01363
1825	2.17378	1.36472	0.719164
1826	2.17741	1.36355	0.851156
1827	2.21546	1.37554	0.953387
1828	2.25319	1.39332	0.945791
1829	2.26596	1.40324	1.15851
1830	2.26489	1.40613	0.847326
1831	2.25776	1.40491	1.10303
1832	2.24799	1.40135	2.91053
1833	2.23803	1.39697	0.8519
1834	2.22832	1.39224	0.940821
1835	2.21919	1.38747	0.990714
1836	2.21078	1.38286	0.950172
1837	2.20289	1.37839	0.9713
1838	2.19543	1.37405	0.985142
1839	2.18838	1.36986	0.951822
1840	2.18168	1.36583	0.937866
1841	2.17531	1.36195	0.940437
1842	2.16924	1.35821	0.912084
1843	2.16342	1.35461	0.90369
1844	2.15785	1.35112	0.899673
1845	2.1525	1.34776	0.917276
1846	2.14735	1.34451	0.958398
1847	2.14295	1.34149	0.97215
1848	2.17067	1.34749	0.947544
1849	2.26789	1.38365	0.821194
1850	2.35489	1.43268	0.845896
1851	2.37026	1.45431	0.895594
1852	2.3652	1.46028	1.15368
1853	2.36086	1.46273	1.02129
1854	2.34686	1.45934	0.949979
1855	2.32897	1.45221	1.08687
1856	2.31096	1.44364	1.55454
1857	2.27999	1.42698	0.825013
1858	2.26725	1.41964	0.954158
1859	2.25573	1.41283	0.998799
1860	2.24518	1.40649	0.960149
1861	2.23542	1.40055	0.907182
1862	2.22632	1.39497	0.940898
1863	2.2178	1.3897	0.940109
1864	2.20979	1.38472	0.922275
1865	2.20222	1.37999	0.897609
1866	2.19504	1.37547	0.901394
1867	2.18821	1.37116	0.921801
1868	2.18171	1.36704	0.96373
1869	2.17536	1.36301	0.993956
1870	2.16282	1.35507	0.533765
1871	2.15648	1.35102	0.476507
1872	2.15288	1.34776	0.748089
1873	2.15223	1.34585	1.17581
1874	2.15082	1.34419	1.41799
1875	2.14764	1.34193	1.31952
1876	2.14321	1.33913	0.839062
1877	2.13818	1.33604	1.07358
1878	2.13252	1.33258	1.16148
1879	2.12176	1.32595	0.866925
1880	2.11717	1.32304	0.982384
1881	2.11281	1.32025	1.01572
1882	2.10861	1.31753	0.949278
1883	2.10454	1.31489	0.95265
1884	2.10061	1.31234	0.944087
1885	2.09681	1.30985	0.904936
1886	2.09312	1.30744	0.896876
1887	2.08954	1.30509	0.896612
1888	2.08607	1.30281	0.952108
1889	2.0827	1.30059	0.965244
1890	2.07942	1.29842	0.86927
1891	2.07621	1.29631	0.913188
1892	2.07297	1.29418	1.2063
1893	2.09339	1.29604	0.827833
1894	2.28437	1.36502	0.94548
1895	2.3862	1.43457	1.1892
1896	2.39211	1.45852	1.61069
1897	2.37406	1.46187	0.770231
1898	2.35183	1.45712	0.953929
1899	2.33013	1.44914	1.27109
1900	2.29362	1.43179	0.824983
1901	2.27864	1.4237	0.934862
1902	2.26556	1.41632	0.9592
1903	2.25383	1.40948	0.956088
1904	2.24313	1.40312	0.954872
1905	2.23328	1.39719	0.940562
1906	2.22412	1.39163	0.930296
1907	2.21556	1.38638	0.935439
1908	2.2075	1.38142	0.914824
1909	2.1999	1.37671	0.912812
1910	2.19268	1.37222	0.916487
1911	2.18583	1.36793	0.902678
1912	2.17931	1.36384	1.0034
1913	2.17294	1.35984	1.5203
1914	2.16825	1.35627	0.711984
1915	2.26905	1.38675	0.82527
1916	2.42455	1.4673	0.722401
1917	2.43913	1.49656	0.970873
1918	2.41624	1.49722	1.26931
1919	2.3886	1.48847	1.23929
1920	2.36299	1.4771	1.69932
1921	2.3052	1.44557	0.782052
1922	2.29059	1.43686	0.90819
1923	2.27752	1.42893	0.923988
1924	2.26578	1.42169	0.89097
1925	2.25501	1.41499	0.913367
1926	2.24501	1.40873	0.92657
1927	2.23569	1.40286	0.909079
1928	2.22694	1.39732	0.873905
1929	2.21869	1.39207	0.869242
1930	2.21089	1.38709	0.880255
1931	2.2035	1.38234	0.896146
1932	2.19648	1.37781	0.894141
1933	2.18978	1.37348	0.899427
1934	2.18339	1.36933	0.90369
1935	2.17722	1.36531	1.05065
1936	2.16778	1.35815	0.718943
1937	2.2176	1.37159	1.00044
1938	2.37149	1.4375	1.17566
1939	2.42926	1.48462	1.40146
1940	2.41808	1.49396	1.71452
1941	2.39337	1.48879	1.47054
1942	2.36886	1.47927	1.75434
1943	2.31085	1.44922	0.849351
1944	2.29602	1.44057	0.885561
1945	2.28284	1.4327	0.904257
1946	2.27091	1.42543	0.890633
1947	2.25994	1.41868	0.915495
1948	2.2498	1.41237	0.920201
1949	2.24035	1.40645	0.897
1950	2.2315	1.40087	0.904305
1951	2.22317	1.39559	0.891714
1952	2.2153	1.39057	0.876282
1953	2.20785	1.3858	0.892066
1954	2.20078	1.38124	0.899613
1955	2.19404	1.37689	0.902606
1956	2.18756	1.37268	0.928362
1957	2.18124	1.36859	1.18947
1958	2.1755	1.3647	0.678486
1959	2.2095	1.37233	0.886784
1960	2.36913	1.43797	0.916792
1961	2.43968	1.49047	0.937082
1962	2.43177	1.50253	1.06739
1963	2.40589	1.49733	1.17047
1964	2.37928	1.4868	0.973208
1965	2.35544	1.47521	1.19489
1966	2.33465	1.46402	1.73896
1967	2.3168	1.45384	0.7814
1968	2.30127	1.44467	0.929434
1969	2.28763	1.43642	0.979991
1970	2.27533	1.42887	0.961746
1971	2.26407	1.42189	0.947629
1972	2.25367	1.4154	0.920552
1973	2.244	1.40931	0.910776
1974	2.23495	1.40358	0.922509
1975	2.22644	1.39817	0.905876
1976	2.21842	1.39305	0.904931
1977	2.21083	1.38818	0.912972
1978	2.20364	1.38354	0.905465
1979	2.19679	1.37912	0.904928
1980	2.19022	1.37486	0.940886
1981	2.18377	1.37068	0.968661
1982	2.17428	1.36342	0.753734
1983	2.21384	1.3744	0.920813
1984	2.30991	1.41374	2.5808
1985	2.38046	1.45648	0.934945
1986	2.38705	1.47228	1.41877
1987	2.37167	1.47226	1.25455
1988	2.31597	1.44963	0.781513
1989	2.3006	1.44142	0.892438
1990	2.28694	1.43374	0.902303
1991	2.27457	1.42656	0.927369
1992	2.26326	1.41982	0.913311
1993	2.25283	1.41351	0.937403
1994	2.24314	1.40757	0.87396
1995	2.23409	1.40198	0.894501
1996	2.22559	1.39668	0.865891
1997	2.21757	1.39166	0.916241
1998	2.20998	1.38687	0.9111
1999	2.20278	1.3823	0.888373
