# Supplementary material for: Evaluating and improving simulations of diurnal variation in land surface temperature with the Community Land Model for the Tibetan Plateau
Source: PeerJ. 2021 Mar 16;9:e11040. doi: 10.7717/peerj.11040 (PMC7977383; doi:10.7717/peerj.11040)
Supplement: Supplemental Information 3 [file peerj-09-11040-s003.xlsx]

## Sheet: air temperature
	CMFD	NASDE
1	257.715	257.715
2	252.127	257.411
3	244.597	252.846
4	243.999	253.106
5	249.529	260.941
6	251.093	261.586
7	254.546	263.534
8	255.141	264.04
9	254.855	261.592
10	249.337	258.113
11	248.081	256.903
12	252.911	262.244
13	253.394	261.775
14	252.314	260.54
15	256.899	261.374
16	256.765	261.634
17	251.82	259.275
18	255.114	260.208
19	254.917	259.727
20	250.027	257.26
21	255.667	262.901
22	256.935	265.843
23	253.593	262.508
24	252.951	261.032
25	254.82	259.975
26	253.44	259.995
27	252.673	258.434
28	253.933	259.044
29	257.849	262.281
30	259.413	264.527
31	256.614	262.82
32	256.313	262.415
33	258.203	262.664
34	260.383	263.718
35	261.846	268.079
36	264.341	270.673
37	263.922	269.317
38	262.815	269.012
39	263.475	267.078
40	258.023	263.397
41	257.543	263.961
42	259.662	264.165
43	260.386	264.714
44	263.494	267.495
45	264.13	269.649
46	261.469	267.372
47	259.607	264.974
48	257.359	264.297
49	257.537	262.848
50	260.753	263.016
51	261.095	264.793
52	258.161	263.461
53	259.795	262.909
54	262.865	265.715
55	262.349	265.662
56	260.886	264.593
57	260.006	264.056
58	259.519	263.047
59	256.152	261.574

## Sheet: FSDS
	CMFD	NASDE
1	49.2188	49.2188
2	137.844	178.695
3	158	175.015
4	165	181.283
5	163.344	175.508
6	167.656	185.84
7	161.625	112.957
8	120.438	122.511
9	92.7188	108.623
10	154.75	116.703
11	169.625	185.621
12	141.625	162.665
13	169.812	188.069
14	179.438	190.47
15	169.781	94.655
16	96.3438	64.1734
17	146.438	166.192
18	159.469	132.424
19	155.281	106.208
20	181.25	196.817
21	180.906	133.087
22	171.531	124.98
23	188.75	152.423
24	191.812	201.69
25	192.719	204.637
26	188.156	209.704
27	182.438	179.111
28	193.406	207.223
29	176.969	158.858
30	175.625	165.245
31	140.219	133.639
32	187.406	171.466
33	196.531	212.667
34	203.344	213.857
35	194.781	182.234
36	170.719	180.483
37	161.094	145.303
38	114.219	118.166
39	115.719	58.8594
40	215.344	234.129
41	199.531	220.094
42	200.719	209.021
43	212.906	229.308
44	179.438	183.532
45	174.562	164.515
46	194.625	158.743
47	81.2812	131.882
48	109.219	143.576
49	170.219	189.891
50	222.781	240.792
51	205.281	229.903
52	220.125	218.121
53	227.031	245.734
54	216.875	239.099
55	223.781	191.262
56	170.562	170.896
57	238.656	252.012
58	154.281	113.391
59	203.375	201.263

## Sheet: LST
	OBS	CMFD-run	NASDE-run
1	267.092	267.126	266.692
2	265.974	262.513	264.774
3	267.872	261.96	266.872
4	271.301	264.854	271.201
5	269.486	267.715	268.186
6	270.237	267.46	268.537
7	275.767	265.562	276.25
8	269.556	263.692	270.859
9	272.213	266.23	270.881
10	280.488	264.762	275.399
11	274.233	266.388	273.278
12	281.825	269.351	277.082
13	279.778	268.297	277.01
14	271.62	268.461	271.161
15	267.734	264.794	269.957
16	280.627	266.625	276.791
17	274.345	266.337	272.109
18	271.52	267.753	271.857
19	280.283	268.014	276.162
20	275.582	269.182	273.38
21	280.341	271.232	275.985
22	275.409	270.202	274.664
23	283.529	269.896	277.87
24	283.48	269.903	278.766
25	282.275	269.583	278.628
26	284.132	269.313	278.213
27	283.559	271.022	277.7
28	280.811	270.002	276.514
29	281.085	271.998	275.283
30	276.159	270.391	272.612
31	279.512	272.386	274.064
32	287.821	273.962	283.044
33	289.373	274.923	282.839
34	285.375	275.509	280.959
35	283.983	274.861	283.812
36	278.286	274.141	277.607
37	278.98	272.007	280.231
38	273.328	272.532	274.584
39	283.223	274.652	283.06
40	285.324	274.601	280.871
41	285.399	275.095	280.883
42	287.159	275.39	282.786
43	287.732	275.07	283.596
44	280.329	275.265	284.007
45	284.087	275.571	284.503
46	277.288	267.465	276.787
47	276.325	267.633	274.165
48	278.284	268.266	275.908
49	284.039	271.822	278.863
50	285.956	274.826	284.698
51	283.792	274.627	283.894
52	289.839	275.419	284.413
53	287.384	275.227	282.034
54	281.313	275.913	283.018
55	278.039	273.565	277.577
56	291.312	273.498	291.671
57	273.024	265.482	270.657
58	281.457	266.398	271.431
59	286.829	269.875	272.941
